# Supplementary material for: Consensus on BCR‐ABL1 reporting in chronic myeloid leukaemia in the UK
Source: PubMed Central journal article supplement — Br J Haematol. 2018 Aug 20;182(6):777–88. doi: 10.1111/bjh.15542 (PMC6175193; doi:10.1111/bjh.15542), 2018-08-20
Supplement: BJH-182-777-s001.pdf [file BJH-182-777-s001.pdf]

## Genetics Report

**Patient details:**

**Sample details:**

**Clinical Summary:** CML on imatinib for 18 months. For *BCR-ABL1* monitoring by RT-qPCR.

### *BCR-ABL1* quantitative PCR (RT-qPCR) monitoring report (transcript type = e13a2/e14a2)

| Treatment response | <i>BCR-ABL1:ABL1</i> % ratio on IS | MR level          | Date next sample due |
|--------------------|------------------------------------|-------------------|----------------------|
| Optimal            | Undetectable                       | MR <sup>4.5</sup> | May 2018             |

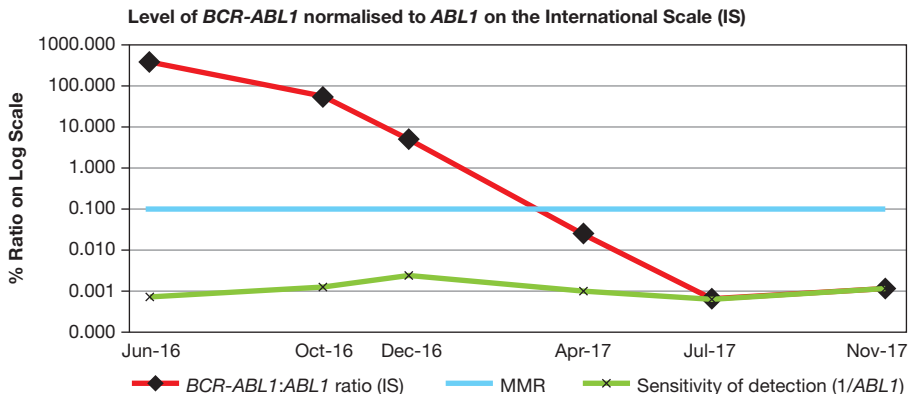

Reported by:

Authorised by:

| Laboratory Number (Sample Type) | Date received | Copies of <i>BCR-ABL1</i> | Copies of <i>ABL1</i> | <i>BCR-ABL1:ABL1</i> ratio (IS) | <i>BCR-ABL1:ABL1</i> ratio on IS (%) | Sensitivity of detection (1/ <i>ABL1</i> ) | Molecular Response (MR) |
|---------------------------------|---------------|---------------------------|-----------------------|---------------------------------|--------------------------------------|--------------------------------------------|-------------------------|
|                                 | 23/06/2016    | 360,000                   | 137,000               | 3.664                           | 366.35                               | 0.000007                                   |                         |
|                                 | 04/10/2016    | 31,000                    | 79,000                | 0.543                           | 54.32                                | 0.000013                                   | #NA                     |
|                                 | 06/12/2016    | 1,500                     | 41,000                | 0.052                           | 5.22                                 | 0.000025                                   | MR <sup>1</sup>         |
|                                 | 19/04/2017    | 15                        | 96,000                | 0.0002                          | 0.023                                | 0.000010                                   | MR <sup>3</sup>         |
|                                 | 26/07/2017    | 0                         | 146,000               |                                 |                                      | 0.000007                                   | MR <sup>5</sup>         |
|                                 | 15/11/2017    | 0                         | 82,000                |                                 |                                      | 0.000012                                   | MR <sup>4.5</sup>       |
