# Supplementary material for: Consensus on BCR‐ABL1 reporting in chronic myeloid leukaemia in the UK
Source: PubMed Central journal article supplement — Br J Haematol. 2018 Aug 20;182(6):777–88. doi: 10.1111/bjh.15542 (PMC6175193; doi:10.1111/bjh.15542), 2018-08-20
Supplement: BJH-182-777-s002.pdf [file BJH-182-777-s002.pdf]

## Genetics Report

Patient details:

Sample details:

**Clinical Summary:** CML on imatinib for 18 months. For *BCR-ABL1* monitoring by RT-qPCR.

### *BCR-ABL1* quantitative PCR (RT-qPCR) monitoring report (transcript type = e13a2/e14a2)

| Treatment response | <i>BCR-ABL1:ABL1</i> % ratio on IS | MR level        | Date next sample due |
|--------------------|------------------------------------|-----------------|----------------------|
| <b>Warning</b>     | 0.1910                             | MR <sup>2</sup> | April 2017           |

Please note that this result could signify a resistance to treatment that may be due to an acquired mutation in the *ABL1* kinase domain (AKD) of the *BCR-ABL1* fusion gene and therefore AKD mutation testing is recommended. Please notify the laboratory if AKD testing is required on the current sample.

**Level of *BCR-ABL1* normalised to *ABL1* on the International Scale (IS)**

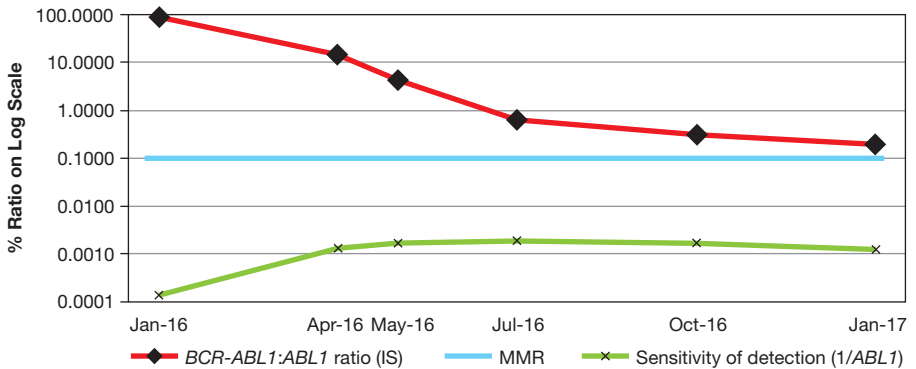

Reported by:

Authorised by:

| Laboratory Number (Sample Type) | Date received | Copies of <i>BCR-ABL1</i> | Copies of <i>ABL1</i> | <i>BCR-ABL1:ABL1</i> ratio (IS) | <i>BCR-ABL1:ABL1</i> ratio on IS (%) | Sensitivity of detection (1/ <i>ABL1</i> ) | Molecular Response (MR) |
|---------------------------------|---------------|---------------------------|-----------------------|---------------------------------|--------------------------------------|--------------------------------------------|-------------------------|
|                                 | 27/01/2016    | 478,000                   | 726,000               | 0.922                           | 92.20                                | 0.000001                                   | #NA                     |
|                                 | 18/04/2016    | 7,900                     | 78,000                | 0.142                           | 14.17                                | 0.000013                                   | #NA                     |
|                                 | 09/05/2016    | 1,900                     | 61,000                | 0.044                           | 4.38                                 | 0.000017                                   | MR <sup>1</sup>         |
|                                 | 21/07/2016    | 240                       | 53,000                | 0.006                           | 0.64                                 | 0.000019                                   | MR <sup>2</sup>         |
|                                 | 21/10/2016    | 140                       | 62,000                | 0.003                           | 0.32                                 | 0.000016                                   | MR <sup>2</sup>         |
|                                 | 19/01/2017    | 110                       | 84,000                | 0.002                           | 0.19                                 | 0.000012                                   | MR <sup>2</sup>         |
