# Supplementary material for: Consensus on BCR‐ABL1 reporting in chronic myeloid leukaemia in the UK
Source: PubMed Central journal article supplement — Br J Haematol. 2018 Aug 20;182(6):777–88. doi: 10.1111/bjh.15542 (PMC6175193; doi:10.1111/bjh.15542), 2018-08-20
Supplement: BJH-182-777-s003.pdf [file BJH-182-777-s003.pdf]

## Genetics Report

Patient details:

Sample details:

**Clinical Summary:** CML on imatinib for 18 months. For *BCR-ABL1* monitoring by RT-qPCR.

### *BCR-ABL1* quantitative PCR (RT-qPCR) monitoring report (transcript type = e13a2/e14a2)

| Treatment response | <i>BCR-ABL1:ABL1</i> % ratio on IS | MR level        | Date next sample due   |
|--------------------|------------------------------------|-----------------|------------------------|
| Failure            | 1.6905                             | MR <sup>1</sup> | As clinically required |

Please note that this result could signify a resistance to treatment that may be due to an acquired mutation in the *ABL1* kinase domain (AKD) of the *BCR-ABL1* fusion gene and therefore AKD mutation testing should be considered. Please notify the laboratory if AKD testing is required on the current sample.

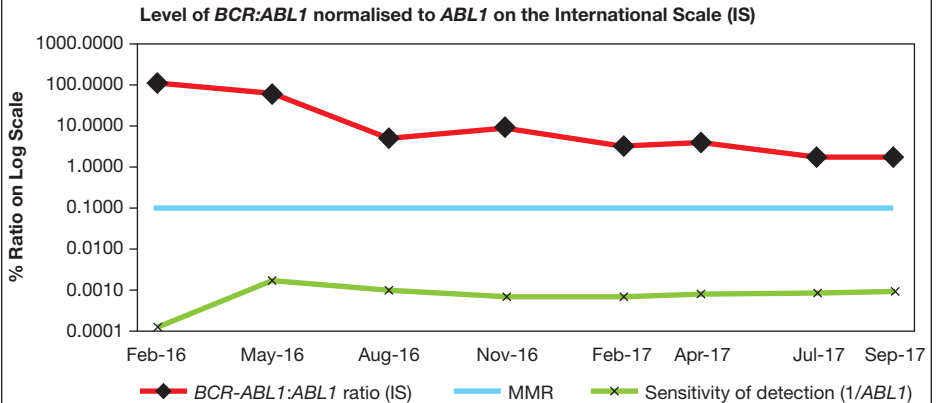

Reported by:

Authorised by:

| Laboratory Number (Sample Type) | Date received | Copies of <i>BCR-ABL1</i> | Copies of <i>ABL1</i> | <i>BCR-ABL1:ABL1</i> ratio (IS) | <i>BCR-ABL1:ABL1</i> ratio on IS (%) | Sensitivity of detection (1/ <i>ABL1</i> ) | Molecular Response (MR) |
|---------------------------------|---------------|---------------------------|-----------------------|---------------------------------|--------------------------------------|--------------------------------------------|-------------------------|
|                                 | 17/02/2016    | 660,000                   | 784,000               | 1.178                           | 117.84                               | 0.000001                                   |                         |
|                                 | 16/05/2016    | 25,000                    | 55,000                | 0.634                           | 64.43                                | 0.000018                                   | #NA                     |
|                                 | 04/08/2016    | 3,500                     | 94,000                | 0.052                           | 5.24                                 | 0.000011                                   | MR <sup>1</sup>         |
|                                 | 28/11/2016    | 8,300                     | 137,000               | 0.085                           | 8.51                                 | 0.000007                                   | MR <sup>1</sup>         |
|                                 | 12/02/2017    | 3,200                     | 140,000               | 0.032                           | 3.17                                 | 0.000007                                   | MR <sup>1</sup>         |
|                                 | 13/04/2017    | 4,000                     | 120,000               | 0.047                           | 4.67                                 | 0.000008                                   | MR <sup>1</sup>         |
|                                 | 25/07/2017    | 1,200                     | 106,000               | 0.016                           | 1.59                                 | 0.000009                                   | MR <sup>1</sup>         |
|                                 | 06/09/2017    | 1,200                     | 99,000                | 0.017                           | 1.69                                 | 0.000010                                   | MR <sup>1</sup>         |
