# Supplementary material for: Consensus on BCR‐ABL1 reporting in chronic myeloid leukaemia in the UK
Source: PubMed Central journal article supplement — Br J Haematol. 2018 Aug 20;182(6):777–88. doi: 10.1111/bjh.15542 (PMC6175193; doi:10.1111/bjh.15542), 2018-08-20
Supplement: BJH-182-777-s004.pdf [file BJH-182-777-s004.pdf]

## Genetics Report

Patient details:

Sample details:

**Clinical Summary:** CML on second-line nilotinib for 2 years and 8 months. For *BCR-ABL1* monitoring by RT-qPCR.

### *BCR-ABL1* quantitative PCR (RT-qPCR) monitoring report (transcript type = e13a2/e14a2)

| Treatment response | <i>BCR-ABL1:ABL1</i> % ratio on IS | MR level        | Date next sample due |
|--------------------|------------------------------------|-----------------|----------------------|
| Optimal            | 0.080                              | MR <sup>3</sup> | January 2018         |

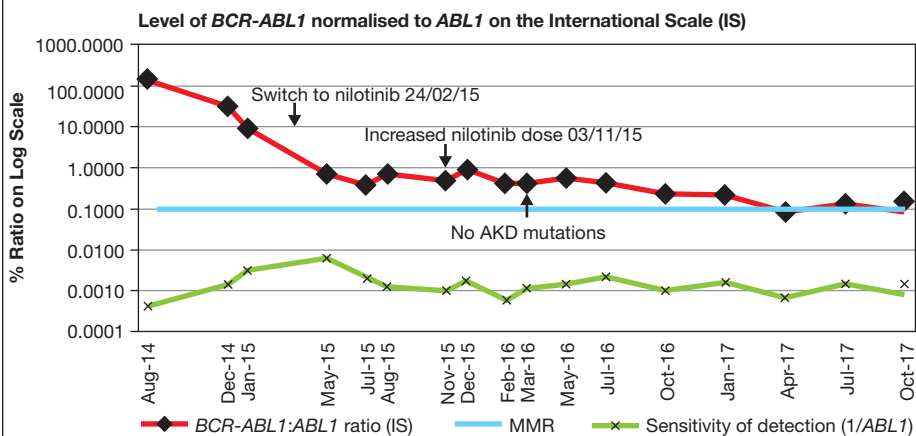

Reported by:

Authorised by:

| Laboratory Number (Sample Type) | Date received | Copies of <i>BCR-ABL1</i> | Copies of <i>ABL1</i> | <i>BCR-ABL1:ABL1</i> ratio (IS) | <i>BCR-ABL1:ABL1</i> ratio on IS (%) | Sensitivity of detection (1/ <i>ABL1</i> ) | Molecular Response (MR) |
|---------------------------------|---------------|---------------------------|-----------------------|---------------------------------|--------------------------------------|--------------------------------------------|-------------------------|
|                                 | 28/08/2014    | 242,000                   | 233,000               | 1.458                           | 145.81                               | 0.000004                                   | --                      |
|                                 | 02/12/2014    | 15,000                    | 69,000                | 0.296                           | 29.61                                | 0.000014                                   | --                      |
|                                 | 20/01/2015    | 2,200                     | 32,000                | 0.094                           | 9.44                                 | 0.000031                                   | MR <sup>1</sup>         |
|                                 | 20/05/2015    | 180                       | 36,000                | 0.007                           | 0.70                                 | 0.000063                                   | MR <sup>2</sup>         |
|                                 | 21/07/2015    | 134                       | 50,000                | 0.004                           | 0.38                                 | 0.000020                                   | MR <sup>2</sup>         |
|                                 | 18/08/2015    | 377                       | 79,000                | 0.007                           | 0.66                                 | 0.000013                                   | MR <sup>2</sup>         |
|                                 | 03/11/2015    | 373                       | 97,000                | 0.005                           | 0.54                                 | 0.000010                                   | MR <sup>2</sup>         |
|                                 | 15/12/2015    | 326                       | 59,000                | 0.008                           | 0.77                                 | 0.000017                                   | MR <sup>2</sup>         |
|                                 | 16/02/2016    | 499                       | 174,000               | 0.004                           | 0.40                                 | 0.000006                                   | MR <sup>2</sup>         |
|                                 | 15/03/2016    | 257                       | 87,000                | 0.004                           | 0.41                                 | 0.000011                                   | MR <sup>2</sup>         |
|                                 | 17/05/2016    | 227                       | 59,000                | 0.005                           | 0.53                                 | 0.000015                                   | MR <sup>2</sup>         |
|                                 | 19/07/2016    | 136                       | 46,000                | 0.004                           | 0.42                                 | 0.000022                                   | MR <sup>2</sup>         |
|                                 | 04/10/2016    | 168                       | 100,000               | 0.002                           | 0.24                                 | 0.000010                                   | MR <sup>2</sup>         |
|                                 | 17/01/2017    | 91                        | 63,000                | 0.002                           | 0.20                                 | 0.000016                                   | MR <sup>2</sup>         |
|                                 | 04/04/2017    | 91                        | 149,000               | 0.001                           | 0.09                                 | 0.000007                                   | MR <sup>3</sup>         |
|                                 | 18/07/2017    | 67                        | 70,000                | 0.001                           | 0.13                                 | 0.000014                                   | MR <sup>2</sup>         |
|                                 | 17/10/2017    | 72                        | 126,000               | 0.001                           | 0.08                                 | 0.000008                                   | MR <sup>3</sup>         |
